# Supplementary material for: Post-transcriptional circadian regulation in macrophages organizes temporally distinct immunometabolic states
Source: PubMed Central journal article supplement — Genome Res. 2021 Feb;31(2):171–85. doi: 10.1101/gr.263814.120 (PMC7849412; doi:10.1101/gr.263814.120), 2021-02
Supplement: supp_gr.263814.120_Supplemental_Data_S1.pdf [file supp_gr.263814.120_Supplemental_Data_S1.pdf]

**Supplemental Data S1. Protein-Protein Interaction Network of the Late wave (“Supplemental\_Data\_S1.pdf”).** A high-resolution overview of the late active wave (CT15-3) protein-protein interaction network with individual gene symbols displayed on each node. Strings shown are high confidence (>.9) interactions and node color corresponds to a gene’s enriched reactome category. Grey coloring represents genes from enriched reactome categories that did not represent a large proportion of the protein-protein interactome or belonged to redundant categories.

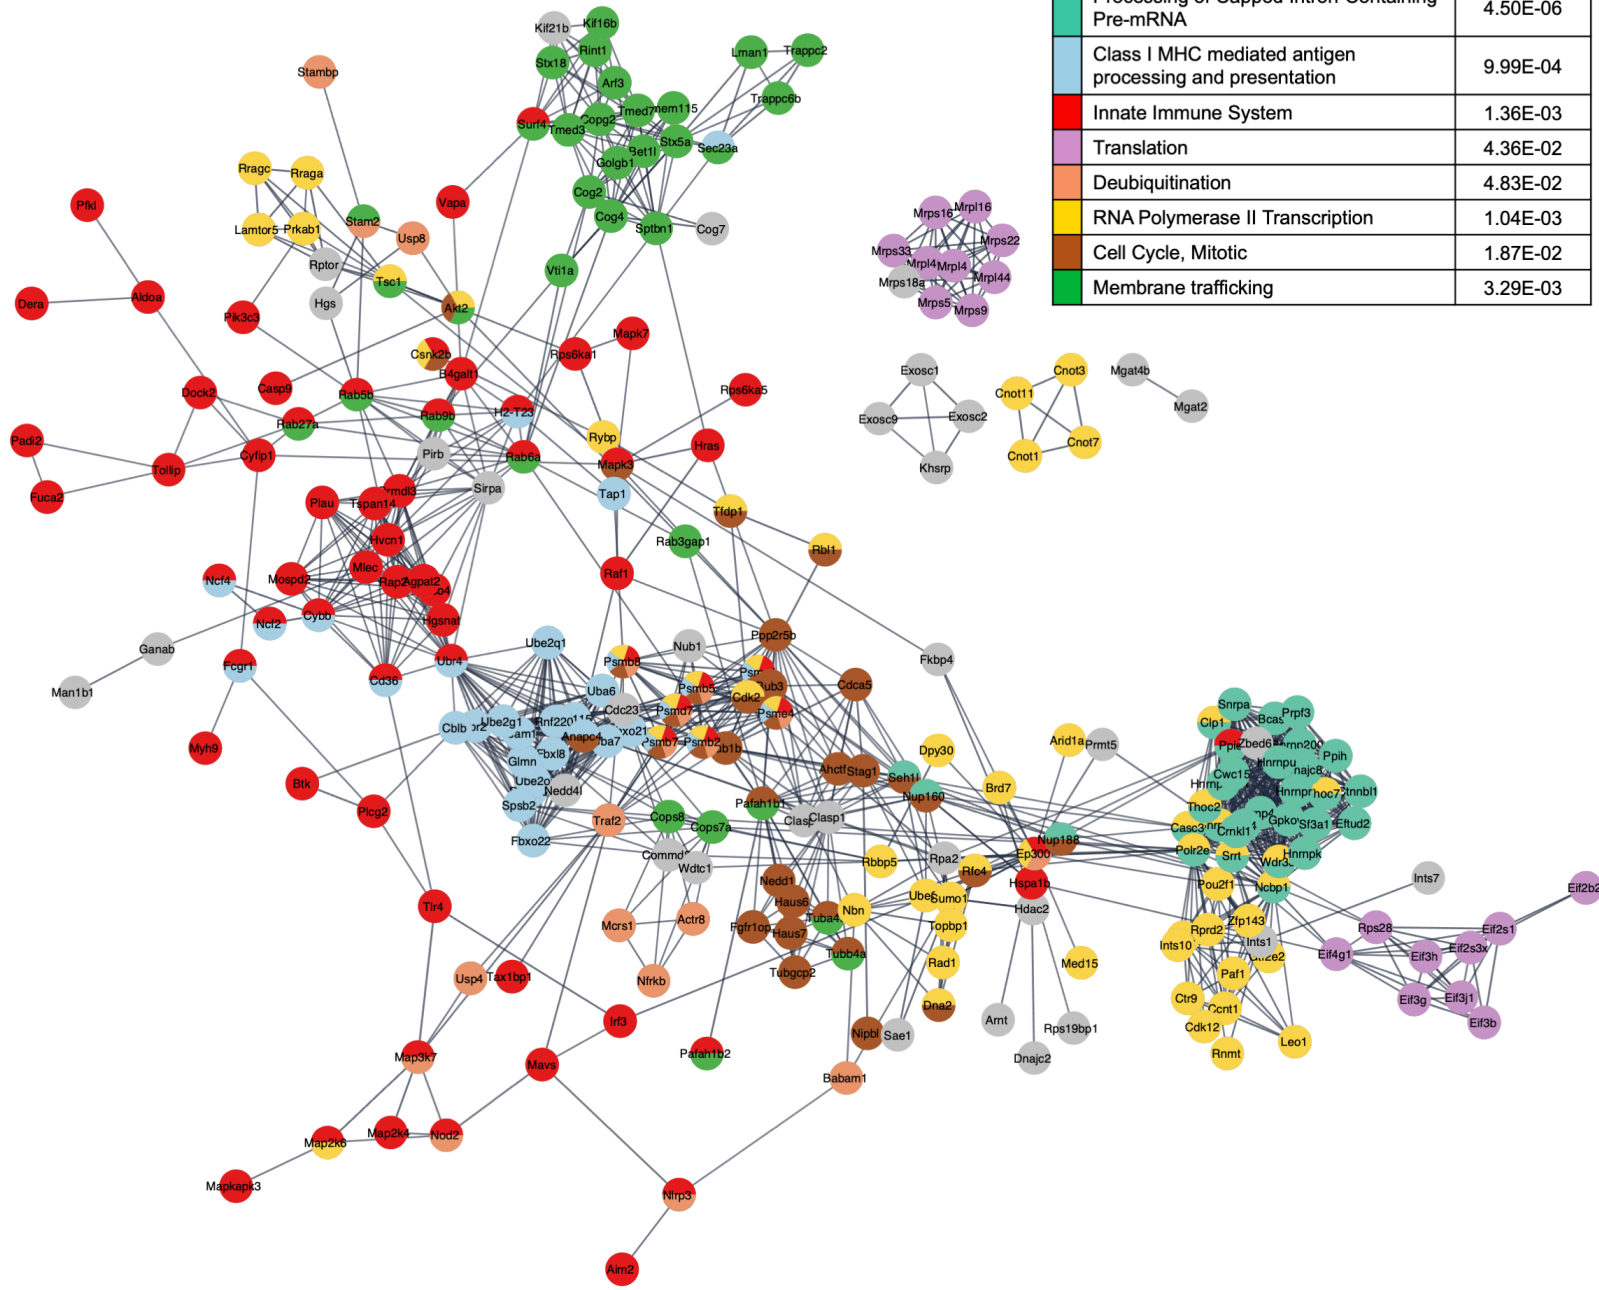

| Reactome pathway name                                    | Enrichment |
|----------------------------------------------------------|------------|
| Processing of Capped Intron-Containing Pre-mRNA          | 4.50E-06   |
| Class I MHC mediated antigen processing and presentation | 9.99E-04   |
| Innate Immune System                                     | 1.36E-03   |
| Translation                                              | 4.36E-02   |
| Deubiquitination                                         | 4.83E-02   |
| RNA Polymerase II Transcription                          | 1.04E-03   |
| Cell Cycle, Mitotic                                      | 1.87E-02   |
| Membrane trafficking                                     | 3.29E-03   |
