# Supplementary material for: Post-transcriptional circadian regulation in macrophages organizes temporally distinct immunometabolic states
Source: HighWire-hosted journal article supplement (doi:10.1101/gr.263814.120), 2021-01-12
Supplement: Supplemental_Table_S1_JDedit.xlsx [file Supplemental_Table_S1_JDedit.xlsx]

## Sheet: Sheet1
Supplemental Table 1: Summary statistics for RNA-seq experiment.
Sample	Index	# Reads	Yield (Mbases)	% of >= Q30 bases	Mean Quality Score
1	TTACCGAC	86651847	26168	89.55	37.6
2	AGTGACCT	80725292	24381	89.32	37.55
3	TCGGATTC	84548600	25535	89.77	37.67
4	CAAGGTAC	77289283	23343	89.82	37.68
5	TCCTCATG	71777712	21676	89.44	37.57
6	GTCAGTCA	69478656	20983	89.51	37.6
7	CGAATACG	68690663	20746	89.46	37.58
8	TCTAGGAG	81346021	24569	89.59	37.62
9	CGCAACTA	85549218	25837	89.37	37.56
10	CGTATCTC	72359709	21852	90.05	37.74
11	GTACACCT	76560068	23121	89.33	37.55
12	CGGCATTA	72344873	21850	89.4	37.57
13	TCGTCTGA	72073498	21767	89.91	37.71
14	AGCCTATC	77718903	23472	89.7	37.65
15	CTGTACCA	90665372	27384	89.64	37.63
16	AGACCTTG	70378280	21254	89.74	37.66
17	AGGATAGC	72407801	21866	89.16	37.5
18	CCTTCCAT	80169232	24212	89.67	37.64
19	GTCCTTGA	73399095	22169	89.53	37.6
20	TGCGTAAC	75022656	22656	89.26	37.53
21	CACAGACT	72334965	21846	89.83	37.69
22	TTACGTGC	75561823	22820	88.58	37.34
23	CCAAGGTT	75928450	22932	89.51	37.6
24	CACGCAAT	88957987	26865	89.4	37.57
25	TTCCAGGT	80180624	24214	89.1	37.49
26	TCATCTCC	74058906	22368	89.51	37.59
27	GAGAGTAC	77882998	23519	90.24	37.8
28	GTCGTTAC	72310870	21837	89.75	37.66
29	GGAGGAAT	80682902	24367	89.33	37.55
30	AGGAACAC	71737678	21664	89.29	37.53
31	CAGTGCTT	82878775	25029	89.1	37.49
32	CTTGCTAG	66611008	20118	89.46	37.58
33	TGGAAGCA	73344448	22149	89.08	37.48
34	AGCTAAGC	66646781	20129	89.15	37.5
35	GAACGGTT	76834108	23204	89.38	37.57
36	GGAATGTC	78156955	23604	89.44	37.57
37	TACGGTCT	77556639	23421	89.35	37.56
38	CCAGTATC	78946594	23841	89.36	37.55
39	TCTACGCA	71534622	21603	89.22	37.51
40	GTAACCGA	66351323	20039	89.32	37.54
41	GACGTCAT	81977069	24756	88.24	37.25
42	CTTACAGC	67135353	20274	88.95	37.44
43	TCCATTGC	68611521	20721	89.61	37.62
44	AGCGAGAT	92692033	27995	89.48	37.59
45	CAATAGCC	72438533	21875	89.28	37.53
46	AAGACACC	63175389	19080	89.53	37.6
47	CCAGTTGA	69084455	20862	88.88	37.42
48	TGGTGAAG	69690389	21047	89.58	37.62
49	AAGACCGT	74602163	22530	89.02	37.46
50	TTGCGAGA	73875289	22309	88.48	37.31
51	GCAATTCC	67007389	20237	89.15	37.49
52	GAATCCGT	71783842	21678	88.9	37.43
53	CCGCTTAA	70663835	21340	88.82	37.41
54	TACCTGCA	66497021	20081	88.31	37.27
55	GTCGATTG	62979228	19020	88.97	37.45
56	TATGGCAC	67650756	20431	88.84	37.41
57	CTCGAACA	69737552	21062	88.65	37.36
58	CAACTCCA	68210480	20598	88.71	37.38
59	GTCATCGT	68267481	20618	88.28	37.26
60	GGACATCA	63542784	19189	88.77	37.4
61	CAGGTTCA	80129462	24198	88.87	37.42
62	GAACGAAG	76975748	23249	89.16	37.5
63	CTCAGAAG	77391639	23372	88.78	37.39
64	CATGAGCA	72823077	21992	88.68	37.36
65	GACGAACT	82557603	24934	88.76	37.4
66	AGACGCTA	83366908	25176	88.43	37.3
67	ATAACGCC	76161398	23002	88.44	37.3
68	GAATCACC	71339454	21542	88.86	37.42
69	GGCAAGTT	82918199	25043	88.42	37.3
70	GATCTTGC	65493389	19779	88.72	37.38
71	TAGGAGCT	80564954	24330	88.79	37.4
72	CGAATTGC	67719100	20450	88.78	37.39
73	GTCCTAAG	73792961	22286	88.99	37.45
74	CTTAGGAC	84574817	25542	88.92	37.43
75	TCCACGTT	90260759	27259	89.13	37.5
	AVERAGE:	7.4978e+07	22643.6	89.184	37.5069
